# Supplementary material for: Colonic Fermentation Promotes Decompression sickness in Rats
Source: PubMed Central journal article supplement (PMC4745042; doi:10.1038/srep20379), 2016-02-08
Supplement: srep20379-s1.pdf [file srep20379-s1.pdf]

# **COLONIC FERMENTATION PROMOTES DECOMPRESSION SICKNESS IN RATS**

Authors : de MAISTRE<sup>1\*</sup> Sébastien, VALLEE<sup>2</sup> Nicolas, GEMPP<sup>1</sup> Emmanuel,  
LAMBRECHTS<sup>2</sup> Kate, LOUGE<sup>1</sup> Pierre, DUCHAMP<sup>3</sup> Claude, BLATTEAU<sup>2</sup> Jean-Eric.

Affiliations :

<sup>1</sup> Service de Médecine Hyperbare et Expertise Plongée, HIA Sainte-Anne, BP600, Toulon  
Cedex 9, France

<sup>2</sup> Équipe Résidente de Recherche Subaquatique Opérationnelle, Institut de Recherche  
Biomédicale des Armées, BP 600, Toulon Cedex 9, France

<sup>3</sup> LEHNA, UMR 5023-CNRS/UCBL, Université Claude Bernard Lyon 1, 43 Bd du 11  
Novembre 1918, Villeurbanne Cedex, France

6 days before pressurization: **Rats randomization**

Weight

4 hours before pressurization: **Force-feeding**

Weight + H<sub>2</sub> and CO<sub>2</sub> in exhaled air + blood cell counts

1 hour before pressurization

H<sub>2</sub> and CO<sub>2</sub> in exhaled air

Removal from the hyperbaric chamber:

0 min: Weight + Clinical observations

30 min: Blood cell counts + Arterial blood gases

Figure 1: Flow chart describing the experimental design

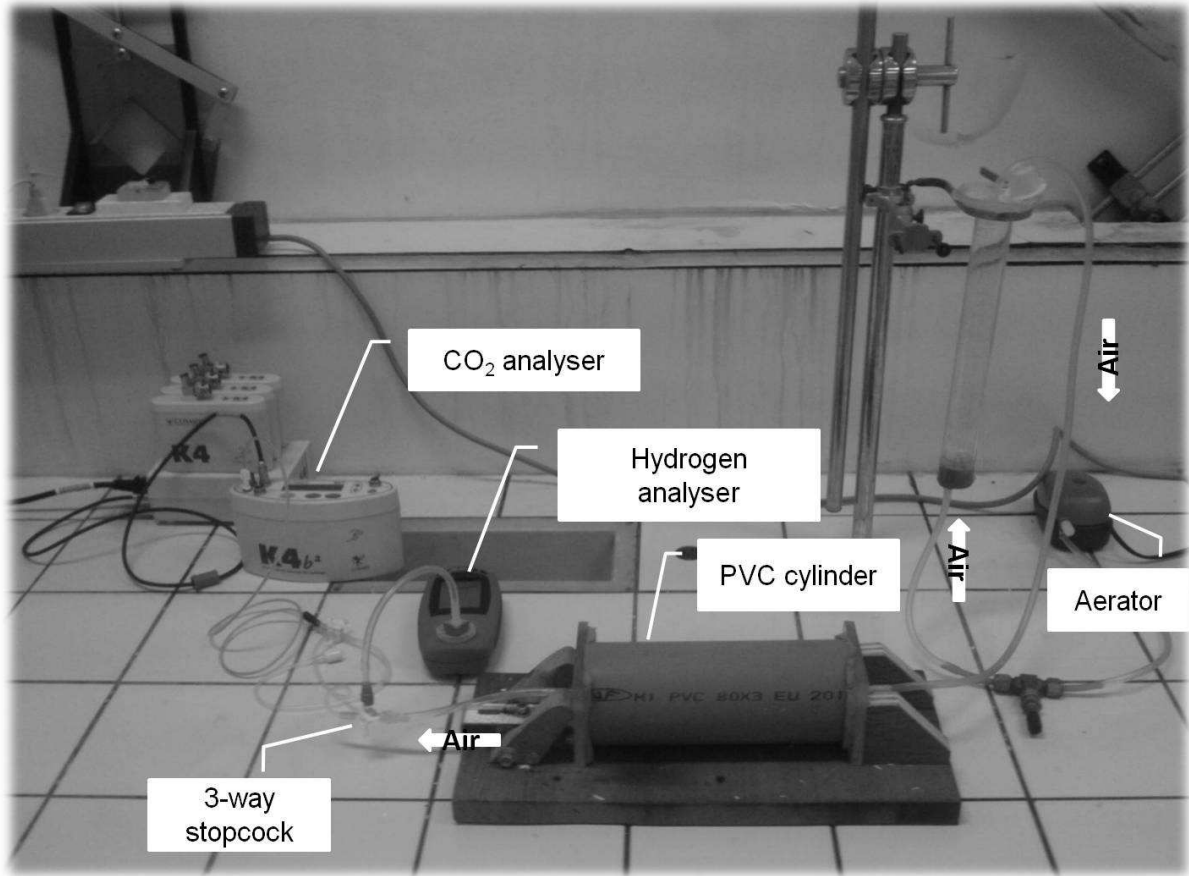

Figure 2: Installation used for the measurement of hydrogen and carbon dioxide in exhaled air in rats.

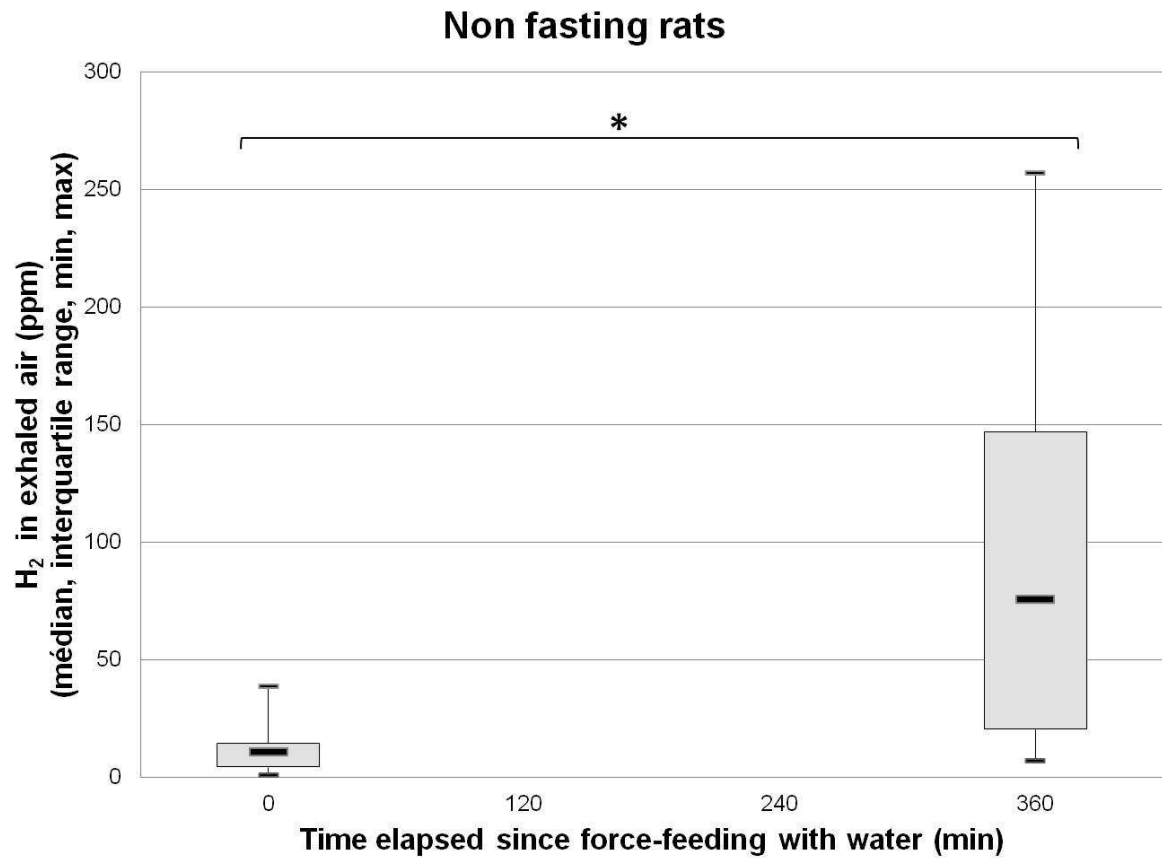

**Figure 3 : Hydrogen in exhaled air after force-feeding with 2.5 ml of water in non fasting rats (n=12). \*denotes  $p < 0.05$  between the paired rats.**
